# Supplementary material for: Exploring the knowledge, attitudes, and perceptions of women of reproductive age towards fertility and elective oocyte cryopreservation for age-related fertility decline in the UK: a cross-sectional survey
Source: PubMed Central journal article supplement — Hum Reprod. 2023 Oct 10;38(12):2478–88. doi: 10.1093/humrep/dead200 (PMC10694402; doi:10.1093/humrep/dead200), 2023-10-10
Supplement: dead200_supplementary_table_s1.pdf [file dead200_supplementary_table_s1.pdf]

Supplementary Table S1. Participant's knowledge of fertility.

|                                                                                                                            | Number (n)  | %           |
|----------------------------------------------------------------------------------------------------------------------------|-------------|-------------|
| <b>What age are women most fertile?</b>                                                                                    |             |             |
| <b>15–19</b>                                                                                                               | <b>1309</b> | <b>23.9</b> |
| 20–24                                                                                                                      | 3355        | 61.3        |
| 25–29                                                                                                                      | 682         | 12.5        |
| 30–34                                                                                                                      | 24          | 0.4         |
| 35–39                                                                                                                      | 1           | 0.02        |
| 40–45                                                                                                                      | 5           | 0.09        |
| Unsure                                                                                                                     | 98          | 1.8         |
| Not answered                                                                                                               | 8           | 0.1         |
| <b>At what age on average do you think a woman's fertility begins to decline?</b>                                          |             |             |
| 15–19                                                                                                                      | 30          | 0.6         |
| 20–24                                                                                                                      | 157         | 2.9         |
| 25–29                                                                                                                      | 1010        | 18.5        |
| 30–34                                                                                                                      | 2504        | 45.7        |
| <b>35–39</b>                                                                                                               | <b>1547</b> | <b>28.3</b> |
| 40–45                                                                                                                      | 196         | 3.6         |
| Unsure                                                                                                                     | 31          | 0.6         |
| Not answered                                                                                                               | 7           | 0.1         |
| <b>What are the chances a woman of 30 years old will become pregnant after one year of unprotected sexual intercourse?</b> |             |             |
| <10%                                                                                                                       | 16          | 0.3         |
| 10–20%                                                                                                                     | 166         | 3.0         |
| 20–30%                                                                                                                     | 479         | 8.8         |
| 30–40%                                                                                                                     | 596         | 10.9        |
| 40–50%                                                                                                                     | 613         | 11.2        |
| 50–60%                                                                                                                     | 891         | 16.3        |
| 60–70%                                                                                                                     | 1037        | 18.9        |
| <b>70–80%</b>                                                                                                              | <b>1112</b> | <b>20.3</b> |
| 80–90%                                                                                                                     | 498         | 9.1         |
| 90–100%                                                                                                                    | 68          | 1.2         |
| Not answered                                                                                                               | 6           | 0.1         |
| <b>What are the chances a woman of 40 years old will become pregnant after a year of unprotected sexual intercourse?</b>   |             |             |
| <10%                                                                                                                       | 687         | 12.6        |
| 10–20%                                                                                                                     | 1094        | 20.0        |
| 20–30%                                                                                                                     | 1258        | 23.0        |
| 30–40%                                                                                                                     | 1000        | 18.3        |
| 40–50%                                                                                                                     | 614         | 11.2        |
| <b>50–60%</b>                                                                                                              | <b>430</b>  | <b>7.9</b>  |
| 60–70%                                                                                                                     | 202         | 3.7         |
| 70–80%                                                                                                                     | 89          | 1.6         |
| 80–90%                                                                                                                     | 21          | 0.4         |
| 90–100%                                                                                                                    | 2           | 0.03        |
| Unsure                                                                                                                     | 79          | 1.4         |
| Not answered                                                                                                               | 6           | 0.1         |
| <b>What are the chances of miscarriage in a woman ≥ 30 years old?</b>                                                      |             |             |
| <10%                                                                                                                       | 106         | 1.9         |
| <b>10–20%</b>                                                                                                              | <b>792</b>  | <b>14.5</b> |
| 20–30%                                                                                                                     | 1953        | 35.7        |
| 30–40%                                                                                                                     | 1285        | 23.5        |
| 40–50%                                                                                                                     | 548         | 10.0        |
| 50–60%                                                                                                                     | 368         | 6.7         |
| 60–70%                                                                                                                     | 142         | 2.6         |
| 70–80%                                                                                                                     | 40          | 0.7         |
| 80–90%                                                                                                                     | 4           | 0.1         |
| 90–100%                                                                                                                    | 3           | 0.1         |
| Unsure                                                                                                                     | 234         | 4.3         |
| Not answered                                                                                                               | 7           | 0.1         |
| <b>What are the chances of miscarriage in a woman ≥ 40 years old?</b>                                                      |             |             |
| <10%                                                                                                                       | 18          | 0.3         |
| 10–20%                                                                                                                     | 119         | 2.2         |
| 20–30%                                                                                                                     | 491         | 9.0         |
| 30–40%                                                                                                                     | 1022        | 18.7        |
| 40–50%                                                                                                                     | 1103        | 20.1        |
| <b>50–60%</b>                                                                                                              | <b>1021</b> | <b>18.6</b> |
| 60–70%                                                                                                                     | 773         | 14.1        |

Continued

Supplementary Table S1. (continued)

|                                                                                                                                                                                                          | Number (n) | %           |
|----------------------------------------------------------------------------------------------------------------------------------------------------------------------------------------------------------|------------|-------------|
| 70–80%                                                                                                                                                                                                   | 497        | 9.1         |
| 80–90%                                                                                                                                                                                                   | 155        | 2.8         |
| 90–100%                                                                                                                                                                                                  | 23         | 0.4         |
| Unsure                                                                                                                                                                                                   | 255        | 4.7         |
| Not answered                                                                                                                                                                                             | 5          | 0.1         |
| <b>Are you aware that getting pregnant at a later age is associated with a greater risk of high blood pressure in pregnancy, blood clots in the legs and lungs and your baby being born prematurely?</b> |            |             |
| Not at all aware                                                                                                                                                                                         | 653        | 11.9        |
| Slightly aware                                                                                                                                                                                           | 1341       | 24.5        |
| Moderately aware                                                                                                                                                                                         | 1573       | 28.7        |
| Very aware                                                                                                                                                                                               | 1205       | 22.0        |
| Extremely aware                                                                                                                                                                                          | 705        | 12.9        |
| Not documented                                                                                                                                                                                           | 5          | 0.1         |
| <b>From what age do you think doctors consider a pregnant woman 'high risk' due to advanced maternal age?</b>                                                                                            |            |             |
| 30                                                                                                                                                                                                       | 315        | 5.8         |
| 31                                                                                                                                                                                                       | 31         | 0.6         |
| 32                                                                                                                                                                                                       | 89         | 1.6         |
| 33                                                                                                                                                                                                       | 82         | 1.5         |
| 34                                                                                                                                                                                                       | 206        | 3.8         |
| 35                                                                                                                                                                                                       | 2606       | 47.5        |
| 36                                                                                                                                                                                                       | 468        | 8.5         |
| 37                                                                                                                                                                                                       | 262        | 4.8         |
| 38                                                                                                                                                                                                       | 340        | 6.2         |
| 39                                                                                                                                                                                                       | 79         | 1.4         |
| <b>40</b>                                                                                                                                                                                                | <b>858</b> | <b>15.7</b> |
| 41                                                                                                                                                                                                       | 17         | 0.3         |
| >41                                                                                                                                                                                                      | 129        | 2.4         |
| Not answered                                                                                                                                                                                             | 0          | 0           |
