# Supplementary material for: Exploring the knowledge, attitudes, and perceptions of women of reproductive age towards fertility and elective oocyte cryopreservation for age-related fertility decline in the UK: a cross-sectional survey
Source: PubMed Central journal article supplement — Hum Reprod. 2023 Oct 10;38(12):2478–88. doi: 10.1093/humrep/dead200 (PMC10694402; doi:10.1093/humrep/dead200), 2023-10-10
Supplement: dead200_supplementary_table_s2.pdf [file dead200_supplementary_table_s2.pdf]

Supplementary Table S2. Participant's knowledge of elective oocyte cryopreservation.

|                                                                                                                                                                   | Number (n) | %    |
|-------------------------------------------------------------------------------------------------------------------------------------------------------------------|------------|------|
| <b>How much does it cost to undergo 1 cycle of social egg freezing in the UK?</b>                                                                                 |            |      |
| <£1000                                                                                                                                                            | 84         | 1.5  |
| £1000–2000                                                                                                                                                        | 744        | 13.6 |
| £2000–3000                                                                                                                                                        | 1371       | 25.1 |
| £3000–4000                                                                                                                                                        | 1229       | 22.5 |
| £4000–5000                                                                                                                                                        | 1015       | 18.6 |
| 5000–6000                                                                                                                                                         | 487        | 8.9  |
| >£6000                                                                                                                                                            | 543        | 9.9  |
| Not answered                                                                                                                                                      | 9          | 0.2  |
| <b>How much does it cost to store the eggs collected per year in the UK?</b>                                                                                      |            |      |
| <£200                                                                                                                                                             | 281        | 5.1  |
| £200–400                                                                                                                                                          | 1923       | 35.1 |
| £400–600                                                                                                                                                          | 1821       | 33.3 |
| >£600                                                                                                                                                             | 1447       | 26.4 |
| Not answered                                                                                                                                                      | 10         | 0.2  |
| <b>Which of the following do you think is the strongest predictor of a successful pregnancy?</b>                                                                  |            |      |
| The age of the woman at the time she freezes her <i>eggs</i>                                                                                                      | 2887       | 52.8 |
| The age of the woman at the time she elects to use her frozen <i>eggs</i>                                                                                         | 1136       | 20.8 |
| The number of <i>eggs</i> collected in total                                                                                                                      | 1441       | 26.4 |
| Not answered                                                                                                                                                      | 17         | 0.3  |
| <b>At what age should a woman freeze her <i>eggs</i> to ensure she has the best chances of having a successful pregnancy when she returns to her <i>eggs</i>?</b> |            |      |
| 20–24                                                                                                                                                             | 2284       | 41.8 |
| 25–29                                                                                                                                                             | 2337       | 42.7 |
| 30–34                                                                                                                                                             | 538        | 9.8  |
| 35–39                                                                                                                                                             | 52         | 1.0  |
| 40–44                                                                                                                                                             | 2          | 0.04 |
| >45                                                                                                                                                               | 0          | 0    |
| Unsure                                                                                                                                                            | 255        | 4.7  |
| Not answered                                                                                                                                                      | 14         | 0.3  |
| <b>Women who freeze their <i>eggs</i> are guaranteed to have a pregnancy in the future?</b>                                                                       |            |      |
| Yes                                                                                                                                                               | 9          | 0.2  |
| No                                                                                                                                                                | 5327       | 97.4 |
| Unsure                                                                                                                                                            | 136        | 2.5  |
| Not answered                                                                                                                                                      | 10         | 0.2  |
